# Supplementary material
Source: PubMed Central journal article supplement (PMC4783869)

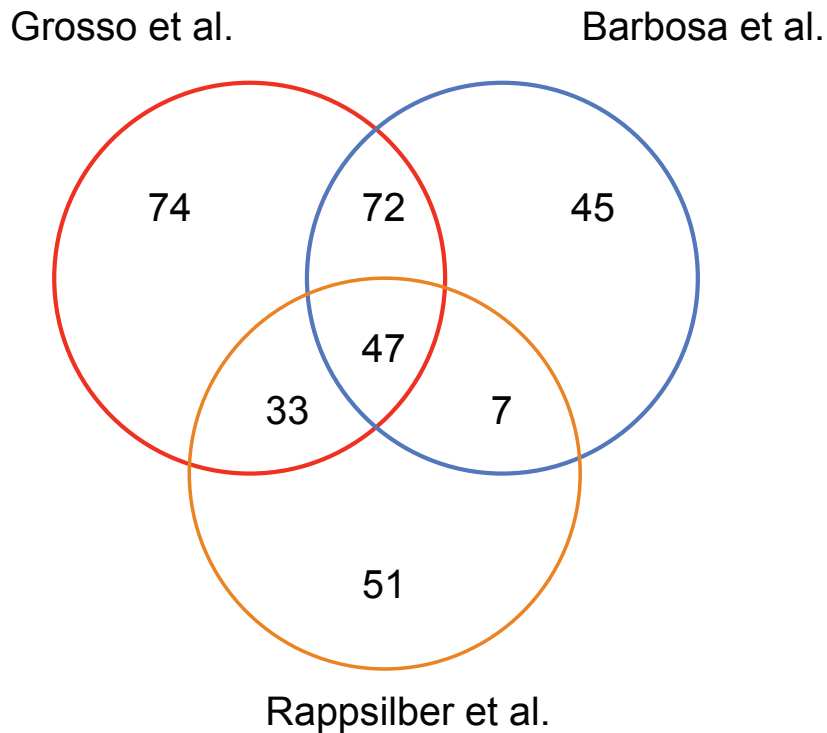

**Supplementary Figure 1 | a, Venn-Diagram of identified splice factors in the work of Barbossa et al., Grosso et al. and Rappsilber et al.** A total number of 329 genes were identified.

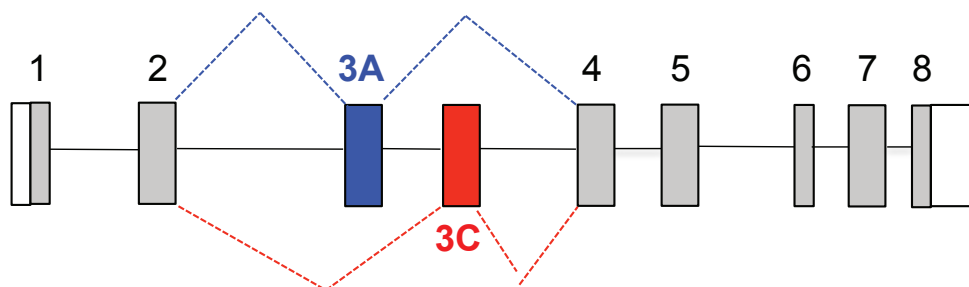

**Supplementary Figure 2 | Schematic representation of *KHK* pre-mRNA.** Alternative spliced exons 3A and 3C leading to expression of either KHK-A or KHK-C protein are highlighted in blue (exon 3A) and red (exon 3C).

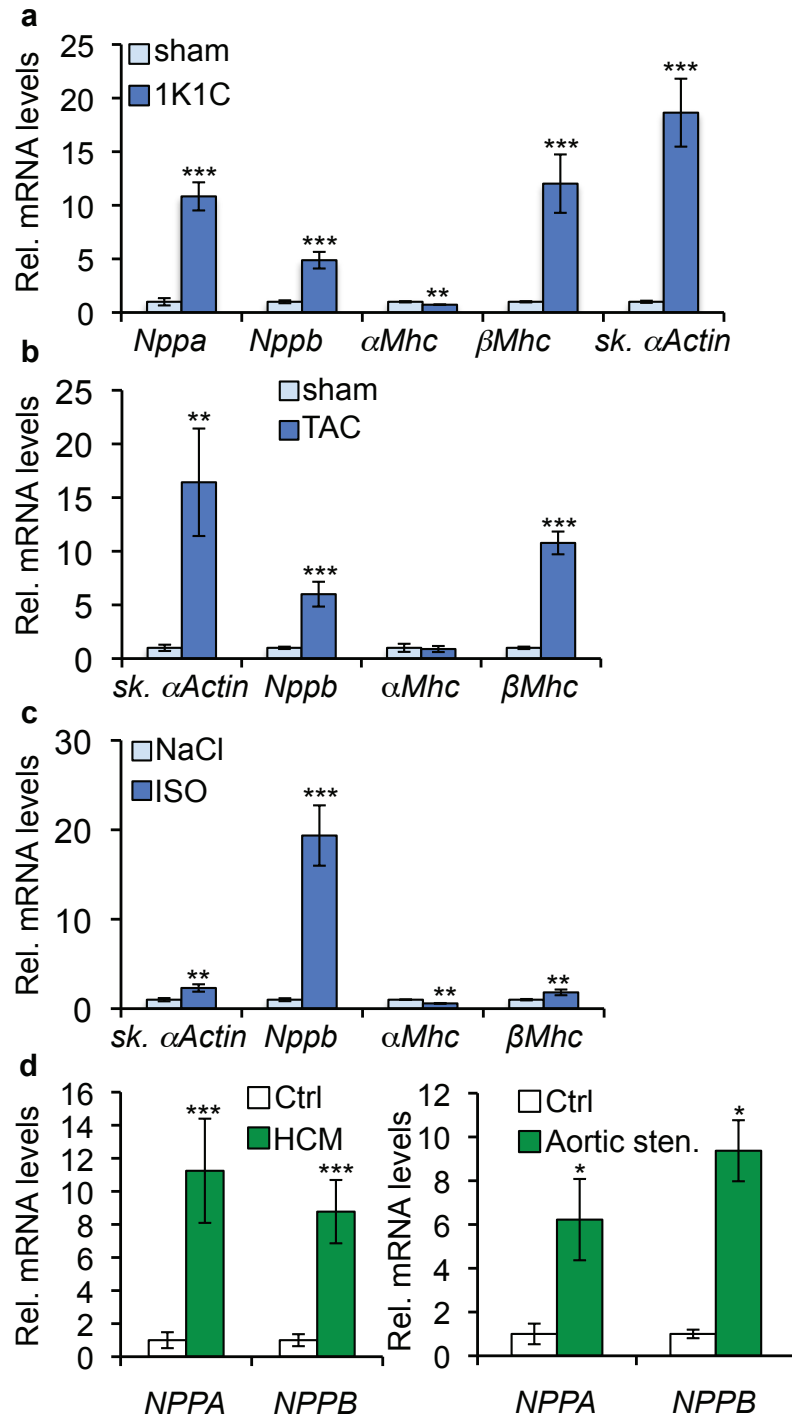

**Supplementary Figure 3 | Gene expression of hypertrophic markers in mouse models of cardiac hypertrophy or heart disease patients and their corresponding controls, presented in Extended Data Fig. 1. a, b,** Probes from left ventricles of 1K1C, TAC or ISO-treated mice and their corresponding controls were analyzed for mRNA hypertrophic markers. All values were presented in relation to sham-operated controls set as 1.0 ( $n = 6$ ; shown is mean  $\pm$  SEM; \* $p < 0.05$ ; \*\* $p < 0.01$ ; \*\*\* $p < 0.001$ ; two-tailed unpaired t-test). **c, d,** Leftventricular biopsies of hypertrophic cardiomyopathy (HCM) patients and healthy controls were analysed for mRNA expression hypertrophic markers (t). All values are presented in relation to healthy controls set as 1.0 ( $n = 6$  for controls and  $n = 16$  for patient samples; shown is mean  $\pm$  SEM; \* $p < 0.05$ ; \*\*\* $p < 0.001$ ; two-tailed unpaired t-test).

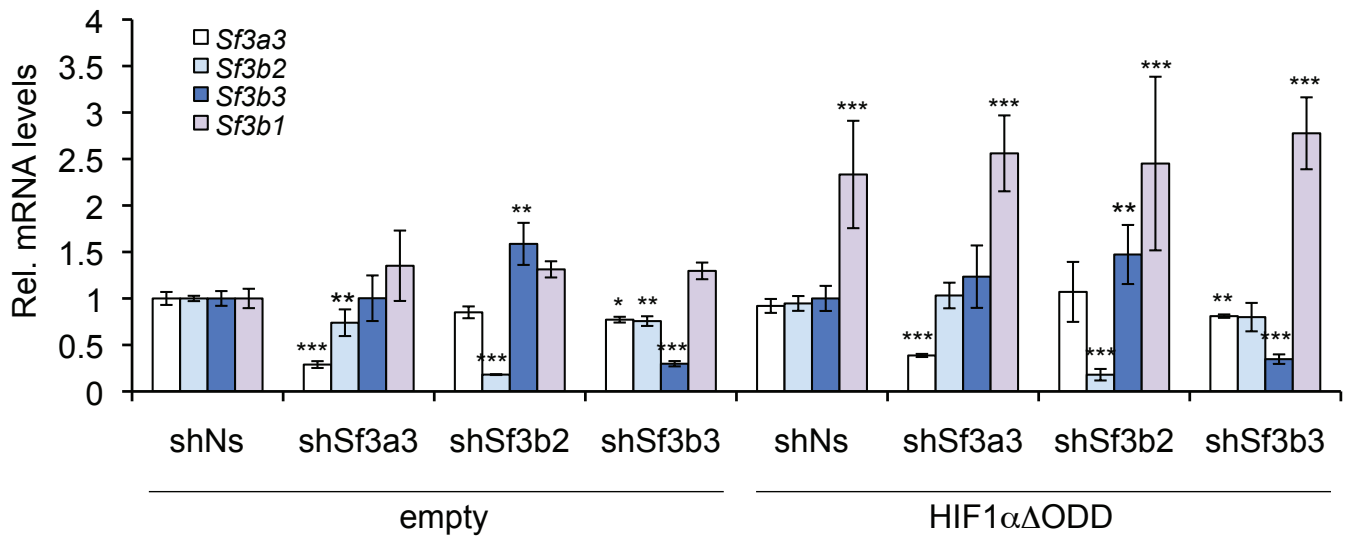

**Supplementary Figure 4 | Depletion of U2-snRNP components in NMC in the presence or absence of HIF1 $\alpha$  $\Delta$ ODD.** NMC were transduced with either scrambled shRNA or shSf3a3, shSf3b2 or shSf3b3 were co-transduced with empty vector or HIF1 $\alpha$  $\Delta$ ODD. Gene expression was evaluated by qRT-PCR. Values were normalised to shNs/empty infected NMC (n = 3; shown is mean  $\pm$  SD; \*p < 0.05; \*\*p < 0.01; \*\*\*p < 0.001; one-way ANOVA followed by Dunnett's multiple comparison post-test).

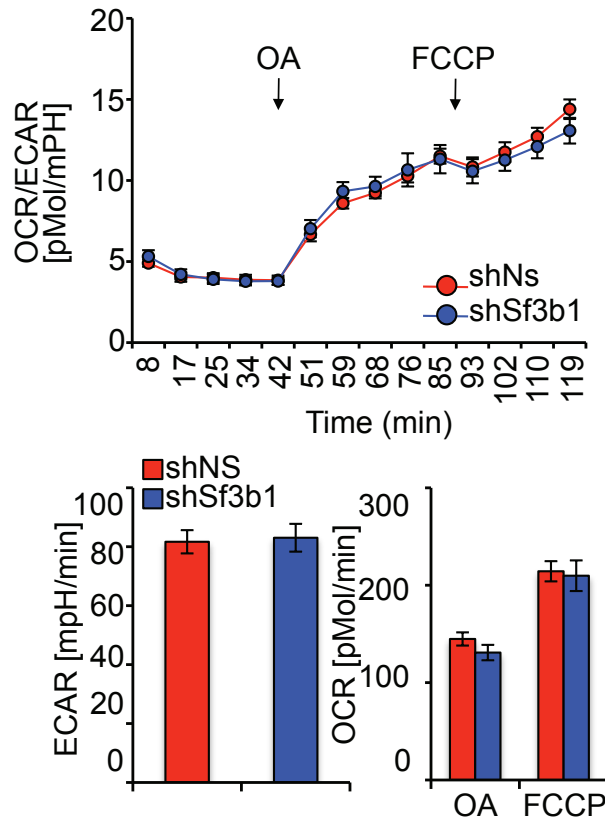

**Supplementary Figure 5 | Assessment of extracellular acidification rate (ECAR), and oleic acid and FCCP-induced oxygen consumption rate (OCR) in NMC transduced with shNs and shSf3b1 lentiviruses.** Highlighted ECAR measurements were done at baseline. All data are compared to shNs-transduced NMC. (n = 9 per condition)

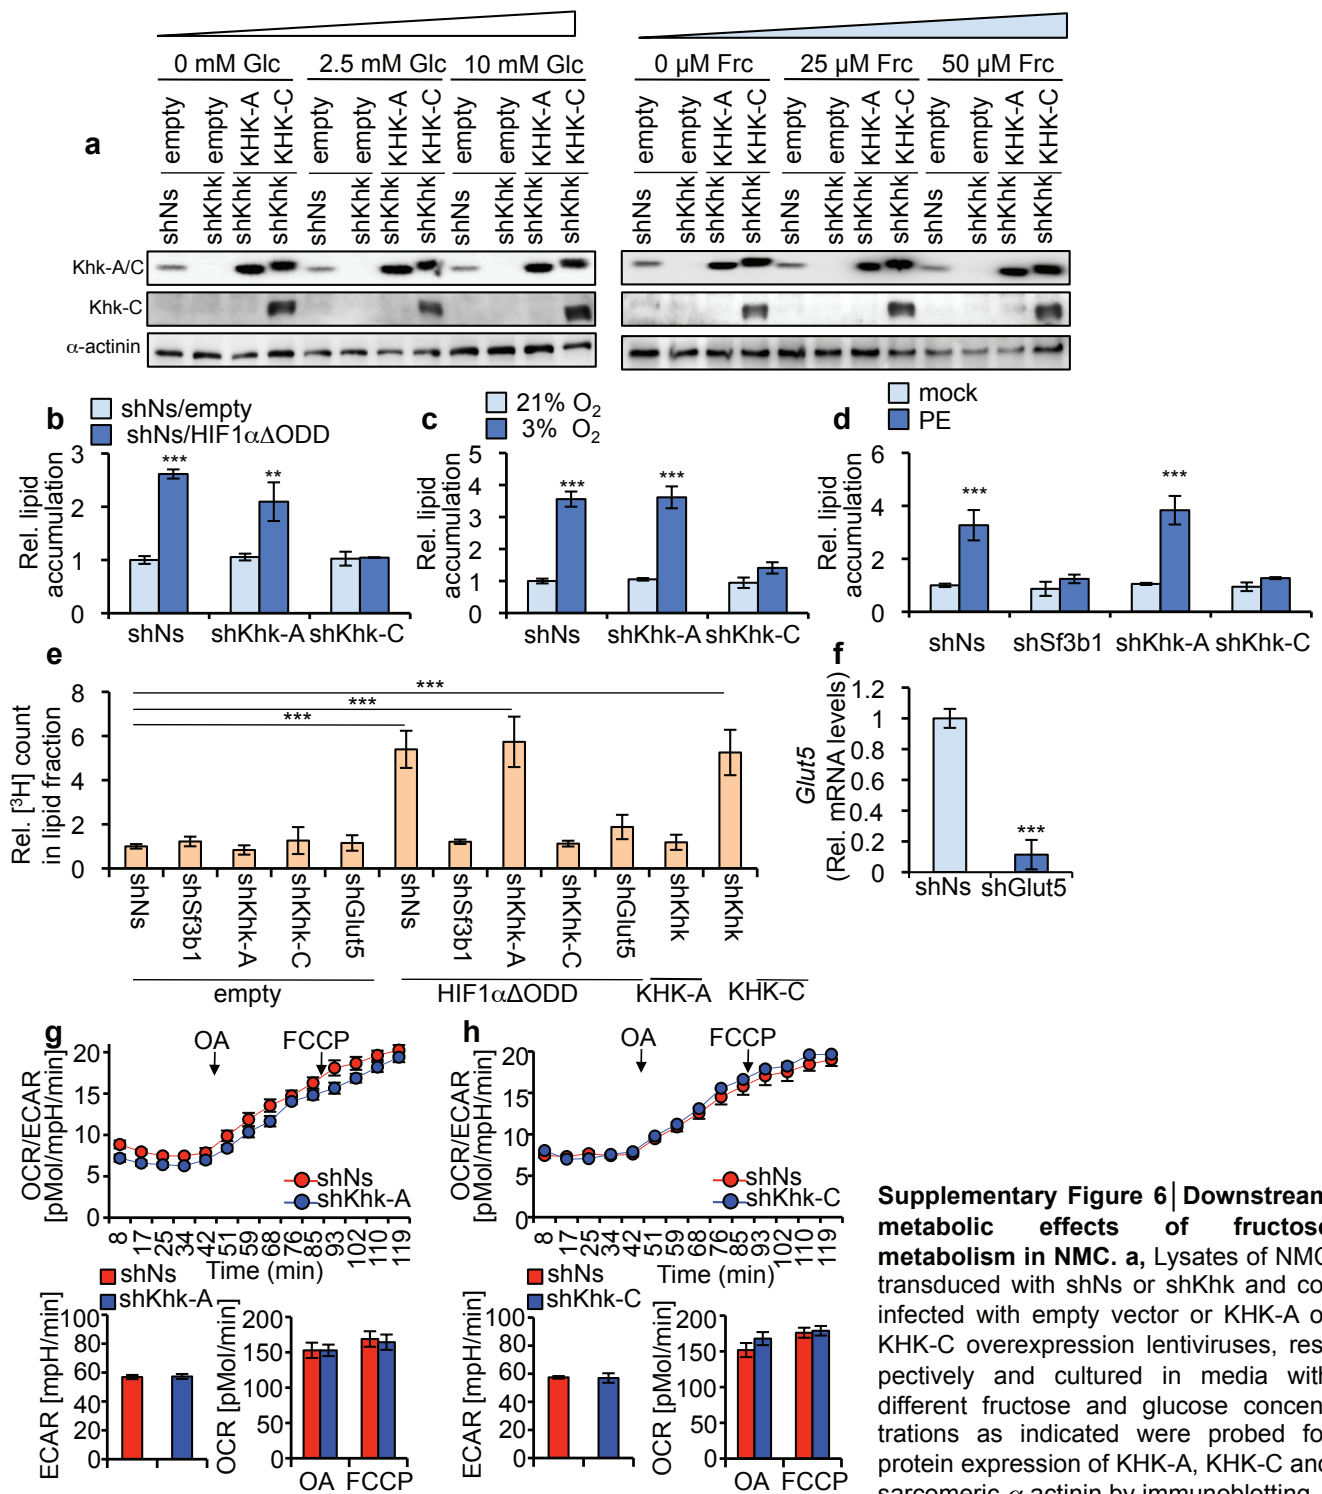

**Supplementary Figure 6 | Downstream metabolic effects of fructose metabolism in NMC. a**, Lysates of NMC transduced with shNs or shKhk and co-infected with empty vector or KHK-A or KHK-C overexpression lentiviruses, respectively and cultured in media with different fructose and glucose concentrations as indicated were probed for protein expression of KHK-A, KHK-C and sarcomeric  $\alpha$ -actinin by immunoblotting.

**B-d**, NMC transduced and treated as indicated were incubated overnight with OA and stained with Nile Red. Stainings were quantified using a plate reader with 485/535 nm excitation/emission filters. Values were compared to control set as 1.0. (n = 3; shown is mean  $\pm$  SD; \*\*\*p > 0.001; one-way ANOVA followed by Dunnett's multiple comparison post-test). **e**, NMC infected as denoted were incubated with oleic acid (OA) and [<sup>3</sup>H]fructose. A lipid extraction was done to assess incorporation of [<sup>3</sup>H] into lipids (n = 4; shown is mean  $\pm$  SD; \*\*\*p > 0.001; one-way ANOVA followed by Dunnett's multiple comparison post-test). **f**, shRNA against Glut5 was evaluated by qPCR for its potential to inhibit *Glut5* expression. Data are shown in relation to shNs NMC (set to 1.0), (n = 3; shown is mean  $\pm$  SD; \*\*\*p > 0.001; two-tailed unpaired t-test). **g, h**, Assessment of ECAR and OA and FCCP-induced OCR in NMC infected with shNs or shKhk-A lentiviruses (**g**) and shNs or shKhk-C lentiviruses (**h**). Highlighted ECAR measurements were done at baseline. All data are compared to shNs-transduced NMC (n = 9; shown is mean  $\pm$  SEM; \*\*\*p > 0.001; two-tailed unpaired t-test).

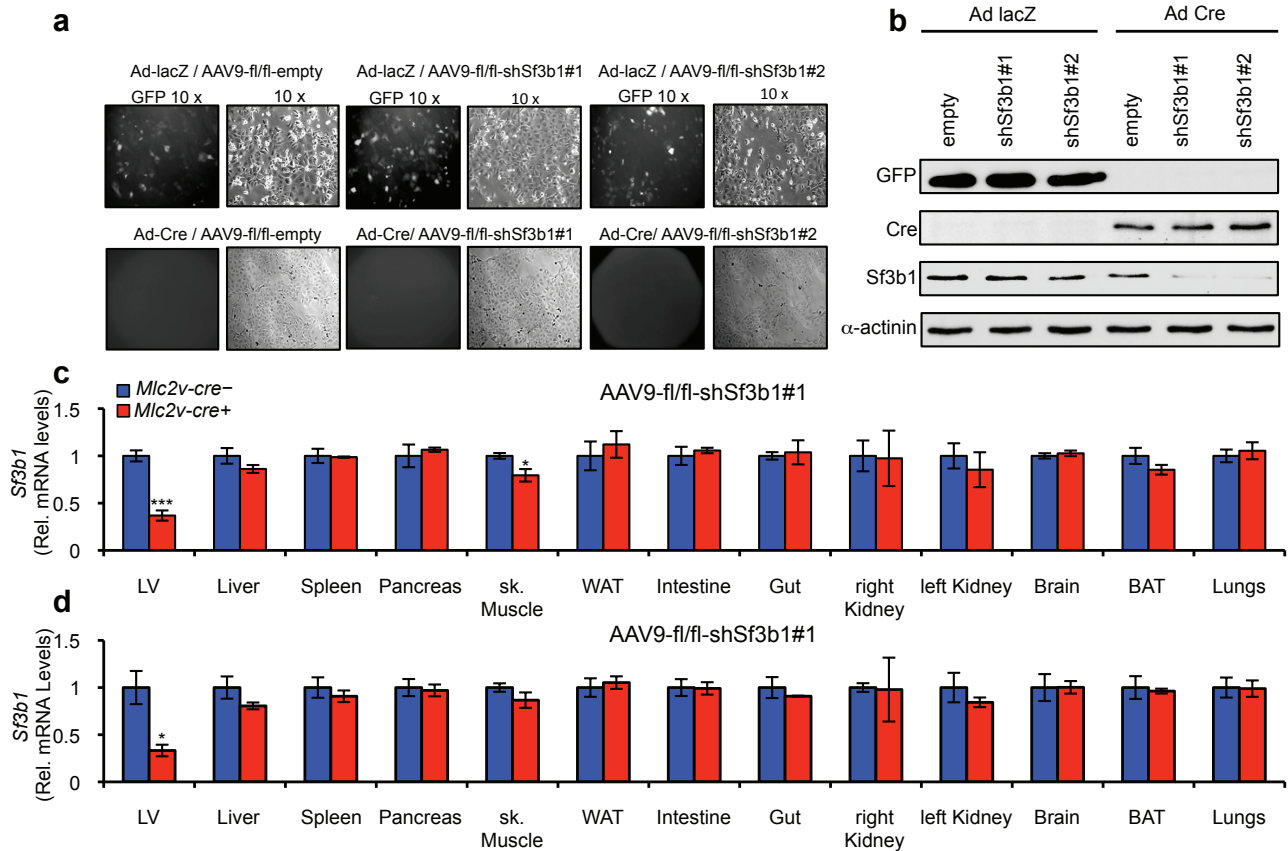

**Supplementary Figure 7 | *In vitro* and *in vivo* validation of modified AAV9.** **a, b**, NMC transduced with AAV9-fl/fl-empty, AAV9-fl/fl-shSf3b1#1 and AAV9-fl/fl-shSf3b1#2 viruses in NMC were investigated for removal of the CMV-GFP/stop reporter cassette by Adeno-Cre-mediated recombination using immunofluorescent microscopy (**a**) and immunoblot detection for indicated proteins (**b**) As a control served transductions with Adeno-lacZ viruses, where the GFP/stop reporter cassette is retained. **c, d**, *Sf3b1* mRNA expression was assessed using qPCR in different organs of *Mlc2v-cre-* and *Mlc2v-cre+* mice injected as in **m**. Data represent mean  $\pm$  SEM; ( $n = 4$  for *Mlc2v-cre-* AAV9-fl/fl-shSf3b1#1 or *Mlc2v-cre+* AAV9-fl/fl-shSf3b1#1 mice and  $n = 3$  for for *Mlc2v-cre-* AAV9-fl/fl-shSf3b1#2 or *Mlc2v-cre+* AAV9-fl/fl-shSf3b1#2 mice; shown is mean  $\pm$  SEM; \*\*\* $p < 0.001$ ; two-tailed unpaired t-test).

| Sample ID | Sex    | Type            | age | AVA (cm <sup>2</sup> ) | MPG (mmHg)                 | PWD (mm)     | IVSD (mm) | Antihyp. Drugs | EF (%) | Type 2 Diabetes |
|-----------|--------|-----------------|-----|------------------------|----------------------------|--------------|-----------|----------------|--------|-----------------|
| LV 1J     | male   | Aortic stenosis | 0.8 | 0.8                    | 54                         | -            | -         | yes            | -      | yes             |
| LV 2J     | female | Aortic stenosis | 0.6 | 0.6                    | 45                         | -            | -         | yes            | 75     | no              |
| LV 3J     | female | Aortic stenosis | 0.7 | 0.7                    | 52                         | -            | -         | yes            | 74     | yes             |
| LV 26     | female | Aortic stenosis | 80  | -                      | 47                         | -            | 14        | yes            | 60     | yes             |
| LV 29     | male   | Aortic stenosis | 74  | 0.8                    | 47                         | -            | -         | yes            | 75     | no              |
| LV 30     | female | Aortic stenosis | 77  | 0.77                   | 44                         | 12           | 13        | yes            | 55     | no              |
| LV 34     | female | Aortic stenosis | 58  | n.a.                   | -                          | -            | -         | yes            | 65     | yes             |
| LV 39     | female | Aortic stenosis | 72  | 0.9                    | 43                         | 15           | 16        | yes            | 70     | yes             |
| LV 41     | female | Aortic stenosis | 83  | 0.7                    | 50                         | 12           | 13        | yes            | 70     | yes             |
| LV 43     | male   | Aortic stenosis | 77  | 0.6                    | 67                         | 14           | 16        | yes            | 60     | -               |
| LV 48     | male   | Aortic stenosis | 77  | 0.6                    | 70                         | 15           | 17        | yes            | 60     | no              |
| LV 33     | male   | Aortic stenosis | 77  | 0.9                    | 43                         | 15           | 15        | yes            | 60     | -               |
| LV 61     | female | Aortic stenosis | 79  | 0.5                    | 50                         | 17           | 15        | yes            | 60     | -               |
| LV 62     | female | Aortic stenosis | 74  | 0.7                    | 38                         | 19           | 19        | yes            | 60     | -               |
| LV 90     | female | Aortic stenosis | 57  | 0.6                    | 52                         | -            | -         | yes            | 60     | -               |
| LV 92     | female | Aortic stenosis | 78  | 0.4                    | 53                         | 17           | 21        | yes            | 60     | -               |
| LV101     | male   | Aortic stenosis | 52  | 0.7                    | 74                         | 14           | 19        | yes            | 60     | -               |
| Sample ID | Sex    | Type            | Age | PCWP (mmHg)            | CI (l/min/m <sup>3</sup> ) | pMean (mmHg) | IVSD (mm) | Hypertension   | EF (%) | LVEDD (mm)      |
| LV 77     | female | HCM             | 77  | 0.7                    | 40                         | 40           | -         | yes            | 65     | -               |
| LV 91     | female | HCM             | 50  | -                      | -                          | -            | -         | yes            | 30     | -               |
| LV115     | female | HCM             | 56  | -                      | 68                         | 68           | 26        | yes            | 60     | -               |
| LV496     | male   | HCM             | 42  | 16                     | 1.80                       | -            | 20        | yes            | 60     | 76              |
| LV535     | male   | HCM             | 45  | 19                     | 1.98                       | -            | 13        | yes            | 18     | 61              |
| LV552     | female | HCM             | 55  | 12                     | 1.67                       | -            | 20        | yes            | 46     | 43              |
| LV624     | female | HCM             | 66  | 25                     | 1.56                       | -            | 31        | yes            | 65     | 35              |
| LV679     | female | HCM             | 53  | 11                     | 2.30                       | -            | 20        | yes            | 39     | 40              |
| LV703     | male   | HCM             | 48  | 23                     | 2.25                       | -            | -         | yes            | 30     | -               |
| LV712     | female | HCM             | 55  | 14                     | 2.00                       | -            | 17        | yes            | 40     | 53              |
| LV007     | male   | HCM             | -   | 33                     | 1.37                       | -            | -         | yes            | 20     | -               |

**Supplementary Table 4 | Demographic and clinical data of patients with Aortic stenosis and hypertrophic cardiomyopathy.**

LV = left ventricle; AVA = aortic valve area; MPG = mean pressure gradient; PWD = posterior wall diameter; IVSD = interventricular septum diameter; EF = ejection fraction; PCWP = pulmonary capillary wedge pressure; CI = cardiac index; pMean = mean pressure; LVEDD = left ventricular end-diastolic diameter.

## The protein coding sequence of (mouse) codon optimised *Sf3b1*

atggcgagatcgccaagactcacgaagatcgaagcacagattcgagaattcaaggcaagaaggcagctcttgatga  
 agcccaaggagtgggccttgattccacaggttattatgaccaagaatttatggtggaagtgatagcagatttgctggat  
 atgtgacatcaattgctgcaactgaacttgaagatgatgacgatgactactcatcatccacgagcttgcctggcagaag  
 aagcctggatcatgccccgctggcgttgccttaatgatataccacagtgcaacagagcagatgatccatttgcctgagca  
 tcgctcctccaaagattgcccgatcgggaagatgaatacaaaaagcataggcggaccatgataatttccccagagcgtcttg  
 atccttttgcagatggagggaaagactcccgatccctaaaatgaaatgctagaacctacatggatgttatgagagaacaacat  
 ttgactaaggaagagagaaaattaggcaacaactagcagaaaagctaaagctggagaactaaaagtcgctcaatggagc  
 agcagcatcccagcctccctcaaaacgaaaacggcgtgggatcagaccgctgaccagactcctggtgccactccccaaa  
 agctatcgagttgggatcaggcagagaccctgggcatacccatctttaagatgggatgagacaccgggtcgtgcaaaa  
 ggaagtgaacacctggcgcaacccagcctcaaaaatttgggacctacaccgagtcataacacctgcgggagctgctac  
 tcctggcgaggcgacacaccaggccatgcaaccccgggcctgggtggtgcaacttccagtgctcgtaaaaacagatggg  
 atgagacccccaaaacagaaagagatactcctgggcatggaagtggatgggctgagactcctgaaacagatcgaggtgga  
 gactctattggtgaaacaccaactcctgggcaagtaaaagaaagtctcgttgggatgaaacgccggcgagctcaaatggg  
 tggagcactcctgctgactcaccgaaaacacaaatggcaccagcctgaacatggctaccggactccaggctc  
 acataatgagcatgacacctgaacagcttcaggcgtggcgtgggagagagaaaattgatgaacgaaaccgcccactttct  
 gatgaaattagatgctatgttcccagaaggataaaagttacttccccctccagctggttatgctcctattcgaactcc  
 agctcgaagctgacagcaactcctacacctttgggtggtatgactggtttccacatgcaaactgaagacagaactatga  
 aaagttgacattgaccagcctctgggaatcttccatttttaaaacctgatgacattcagctactttgataaactatggtt  
 gatgtagatgaatcaacacttagctcagaagaacaaaagaagaaaaataatgaagttgcttttaaaaataagaatgg  
 tacacctcaatgagaaaggctgccttacgtcagattactgataaaagctcgagaatttggagccggaccactgttcaacc  
 agattctgcccactgctgatgacacactacactggaagaccagagagacacctgctggtgaaggtcatcgaccggattctg  
 tataaactggcagctgctggtgagaccatcctcctcaaaaatcctggtgctcattgagccctgctgatcgacgaagatta  
 ctatgccaggggtggagggcagagaaatcttcaaacctggctaaagccctggactggcaacaatgatcagcactatgc  
 ggcccacattgataacatggatgagtatgtgagaaaatccacagcagcggcctcgtctggtcgcaagtgcctggg  
 atcccctcactgctgcctttctgaaagccgctgtgcaaatctaaagaaagtggcagccagcagcactgggatcaagat  
 tgtgagcagatcgccattctgatggctgtgctatcctgctcactcctgagcagctggtggagatcattgaaatggcc  
 tggtagcagcagcagcaaggtcaggaactatctcagctcggcaattgcaagccctggctgaggtgcaaccccttggga  
 atcgaatcattcgatagcgtgctgaagccactgtggaaggaattcgacagcataggggcaagggactggccgctttct  
 gaaagccatcggctatctgatctccactgatggacgcccagtagcctaaactatacacgggaagtgatgctgatcctga  
 ttcgaggttccagagccccgacgaggaatgaagaaaatcgtgctgaagtggtgcaaacagtgctggtggcacagatgga  
 gtggagccaattatatacaaaactgaaatctgccccttctttaaagcactttggcagcatcgatggcctggacag  
 gaaaactaccgacagctggtgatactaccgtcgaactggctaataaggtcggagcagccgagatcattagcagaatcg  
 tcgacgatctgaaggatgagccgaacagtagtaccggaaaatggtcatggagaccatcgaaaagatattgggaaacctggg  
 gctcgacacatcgatcacaagctggaggaacagctgatcgacgggattctgtagccttccaggagcagacaactgaaga  
 tccgctgatgctgaacgggttggcaccgctggtcaatgctcgggaaagcggctgaaaccttaactgccacagatctg  
 ggacagcctgctggcggctgaaacaataagctcgaaaaagctgcgcaagcagccgctgacatgatcagtaggactgctg  
 gctatgaagacctgctcagggagaaaactgatgggacacctgggggtggtcctgtacgaataatctgggggaggaatacc  
 agaggtgctggggtctatcctgggcccgttaaaggccatcgtgaacgtcattggcatgcacaagatgacccaccatca  
 aagatctgctgcccagctgacaccatctgaagaacaggcatgagaaagtgcaagaaaattgcatgacctggtggga  
 agaattgctgatcggagctgagatgtgagtgcccagagaaatggatgaggtatggttgcagctgctgaaactgctgaa  
 ggacacaaagaaagccattcggcgcctactgtgaataaccttgggtacatcgcaaaagctattggacctatgacgtgc  
 tggccacctgctgaaacaatctgaaggtccaggagagacagaaccgggtgtgaccacagctgcaatcgccattggtggc  
 gagacctgttcccctttcacagctcctgccagctctgatgaatgagtagagtgctgaaactgaaactgacagatggcgt  
 cctgaaaagcctgctcctcctgttgagtagatcctcggaatgggaaagactacatctacgagtgacaccactgctgg  
 aggatgccctgatggaccgctgctggtgcaccgacagactgctagcgcagtggtccagcattatgctcctgggagtgat  
 ggattcgggtgagagactccctgaaccactgctgaattacgtgtggcccaactccttgaacctctcctcatgctgat  
 ccaggcagctcatggagccctggagggactgaggggtggccattggaccctgcagaatgctgcagatattgctgcagggc  
 tgttccacctgctcgaaggtgcagagctgtactggaagatcataaactcctcctacatcgctcagagatgctctg  
 attgcacattaccctcgaatctacaatgacgacaagaacacttacatccgctatgaactggactacatcctgtga

## Translation of the protein coding sequence of (mouse) codon optimised *Sf3b1*

MAKIAKTHEDI EAQIREIQGKKAALDEA QVGLDSTGYDQEIYGGSDSRFAGYVTSIAATELEDDDDDDYSSSTSLLGQKPGYHAPVAL  
 LNDIPQSTEQYD PFAEHRPPK IADREDEYK KHRRTMI I SPERLDPFADGGKTPDPKMNARTYMDVMREQHLTKEEERIRQQLAEKAKAGE  
 LKVVNGAASQPPSKRRRWDQTADQTPGATPKKLSWDAETPGHTPSLRWDETPGRAKGS ETPGATPGSK IWDPTPSHTPAGAATPGR  
 GDTPEGHATPGHGGATSSARKNRWDETPKTERDTPGHGSGWAETPRDRGGDSIGETPTPGASKRKRWDETPASQMGSTPVLTPGKTPI  
 GTPAMNMTPTPGHIMSMTPEQLQAWRWEREIDERNRPLSDEELDAMFPEGYKVLPPPAGYVPIRTPARKLTATPTPLGGMTGFHMQTED  
 RTMKS VNDQPSGNL PFLKPD DIQYFDKLLVDVDESTLSP EEQKERKIMKLLKIKNGT PPMRKAALRQITDKAREFGAGPLFNQILPLLM  
 SPTLEDQERHLLVKVIDRILYKLLDLDLVRP VVHKILVVI EPLLIDEDY YARVEGREI ISNLAKAAGLATMISTMRPDIDNMEYVRNTAR  
 AFAVSALGIPSLPLFLKAVCKSKSQW ARHTGKIIVQOIA ILLMGCALP HLRSLVEI I EHLGLVDEQQKVRTISALAI AALAEATPYG  
 IESFDSVLKPLWKGIRQHRKGLAAFLKAI GYLIPLMDAEAIYNYTREVMLILIREFQSPDEEMKKI VLKVKVQCCGTDGVEANYIKTEI  
 LPPFFKHFWQHRMALDRRNYRQLVDTTVELANKVGA AEI ISRI VDDLKDEAEQYRKMVMETIEKIMGNLGAADIDHKLEEQ LIDGILYAF  
 QEQTTEDSVMLNGFGTVVNALGKRVPKYP LQICGTVLWRLNNSAKVRQQAADLISRTAVVMKTCQEEKLMGHLGVVLYEYLGE EYPEVL  
 GSILGALKAIVNVI GMHKMTPPIKDLLPRLTPI LKNRHEKVQENCIDLVGR IADRGA EYVSAREWMRICFELLELLKHKHKAIRRATVT  
 FGYIAKAI GPHVDL ATLLNNLKVQERQNRVCTVAIAI VAETCSPTT VLPALMNEYRVP ELNVQNSLFSFLFEYIGEMGKDIYAVT  
 PLEEDALMDRDLVHRQTASAVVQHMSLGVYFGCEDSLNHLNLYVWPNVFETSPHVIQAVMGALEGLRVAIGPCRMLQYCLQGLFHPARK  
 VRDVYWKIYNSIYIGSDALIAHYPRIYNDKNTYIRYELDYIL\*

## Supplementary Data 1 | Coding and amino acid sequence of (mouse) codon optimised *Sf3b1*.



Agarose gel referring to Fig. 1c

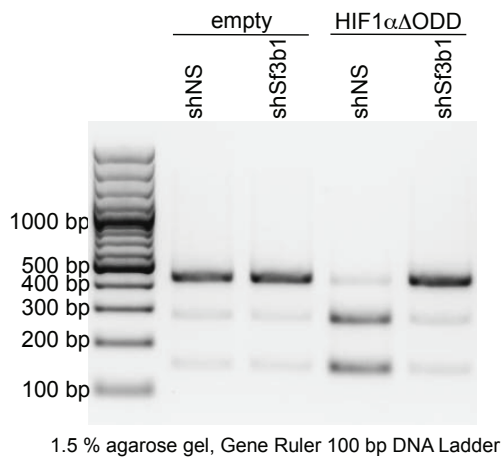

Agarose gel referring to Fig. 1d

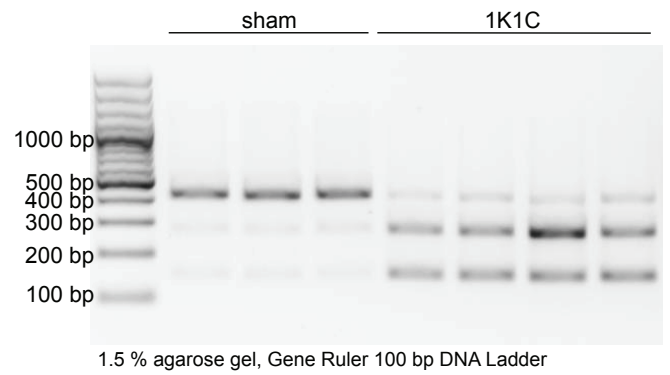

Agarose gels referring to Fig. 1g

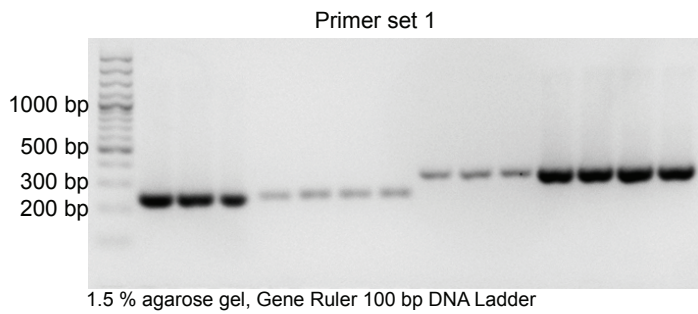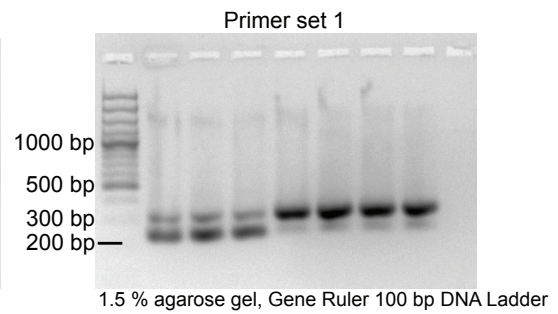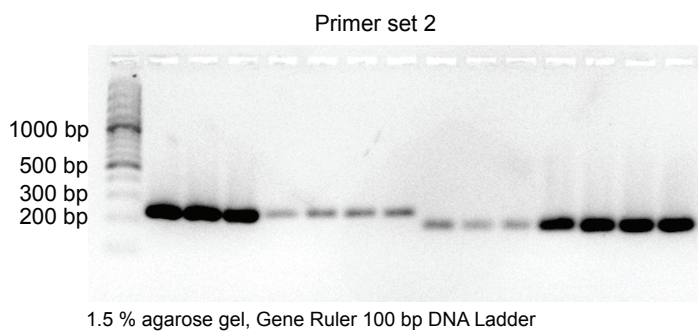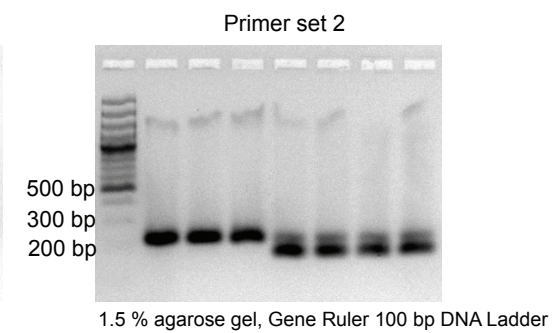

Immunoblots Figure 1e

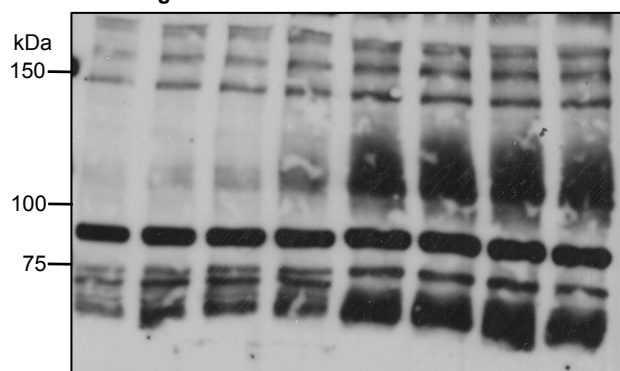

Anti-HIF1α

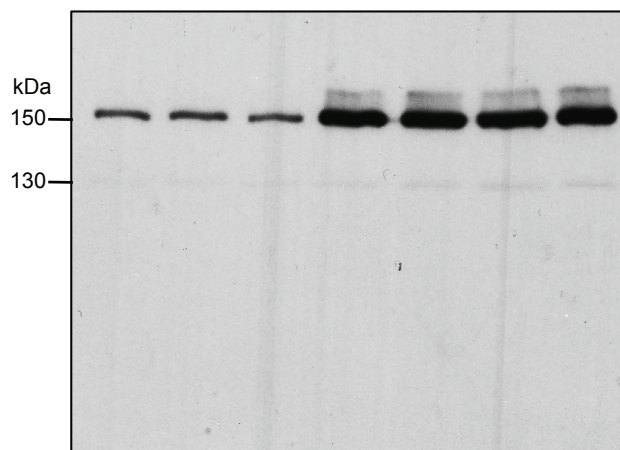

Anti-Sf3b1

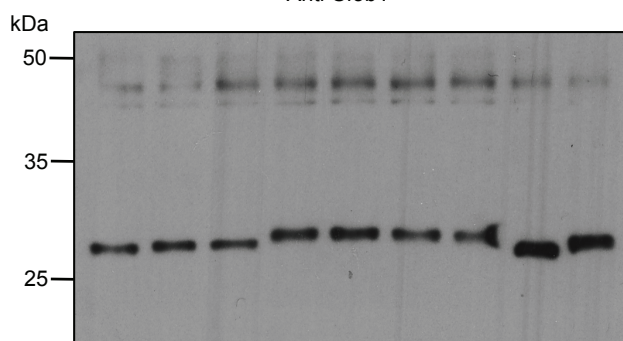

Anti-Khk-A/C  
(I. E.)

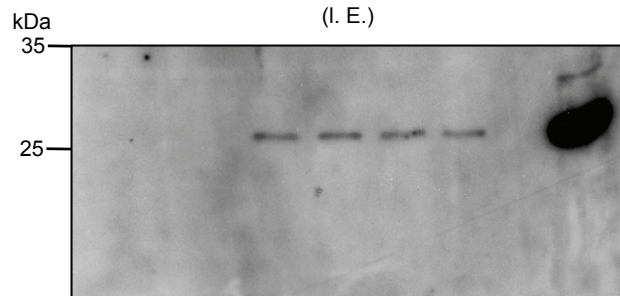

Anti-Khk-A/C

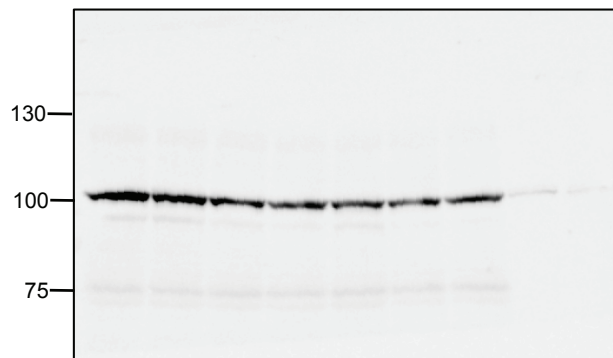

Anti-αActinin

Immunoblots Figure 1h

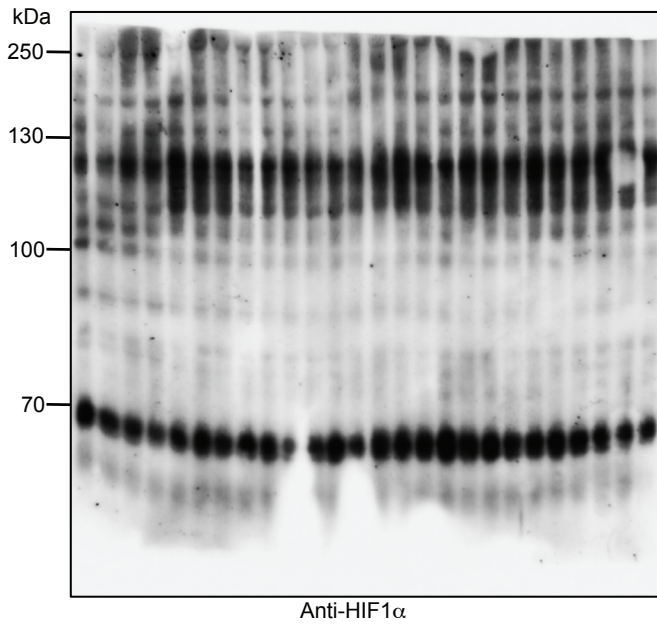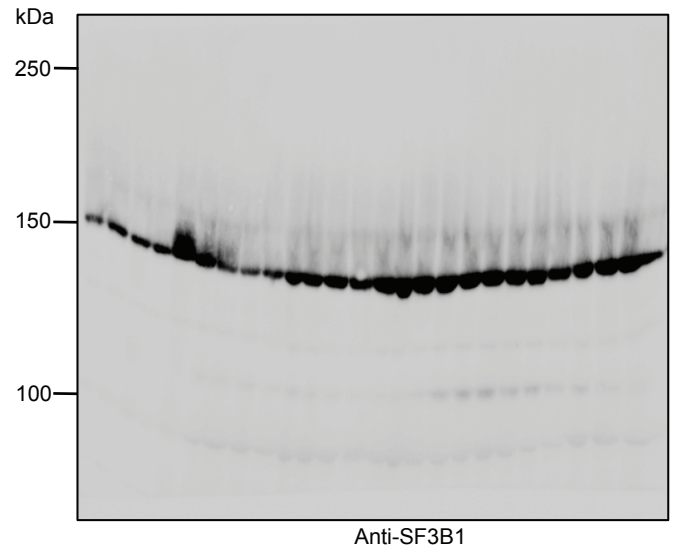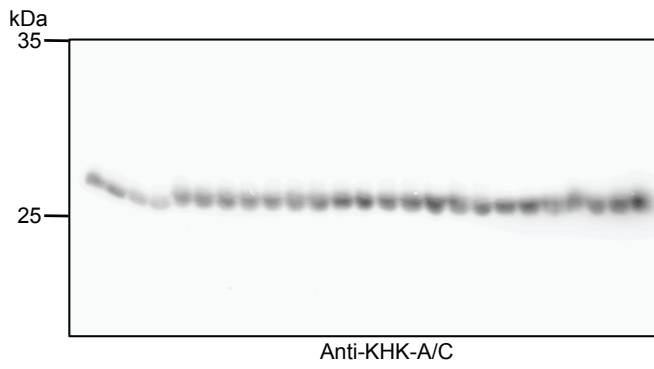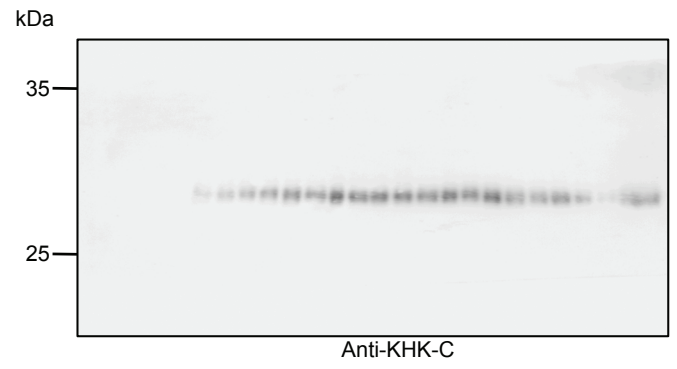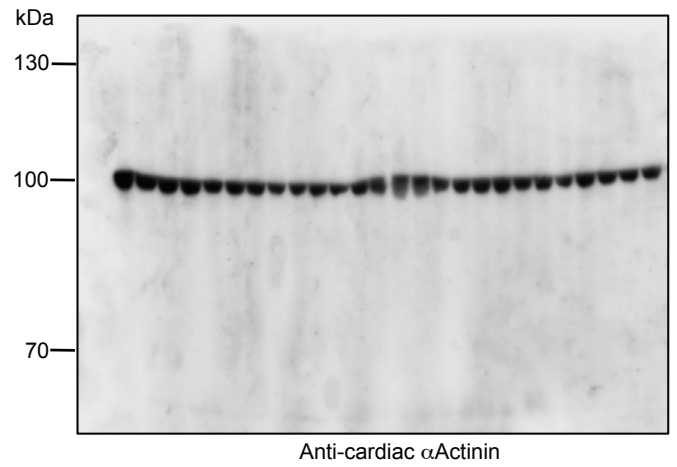

ChIP Fig. 2b

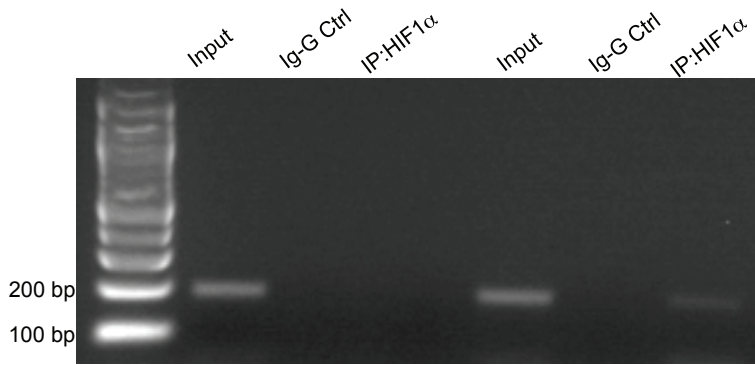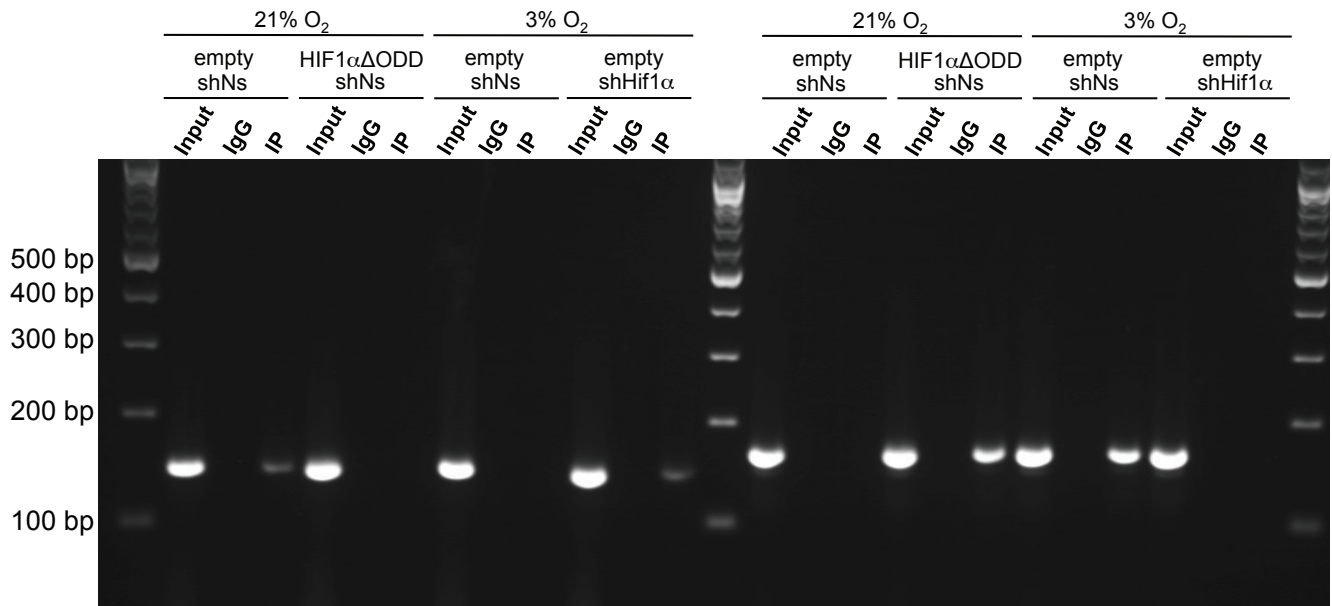

Immunoblots Figure 4e

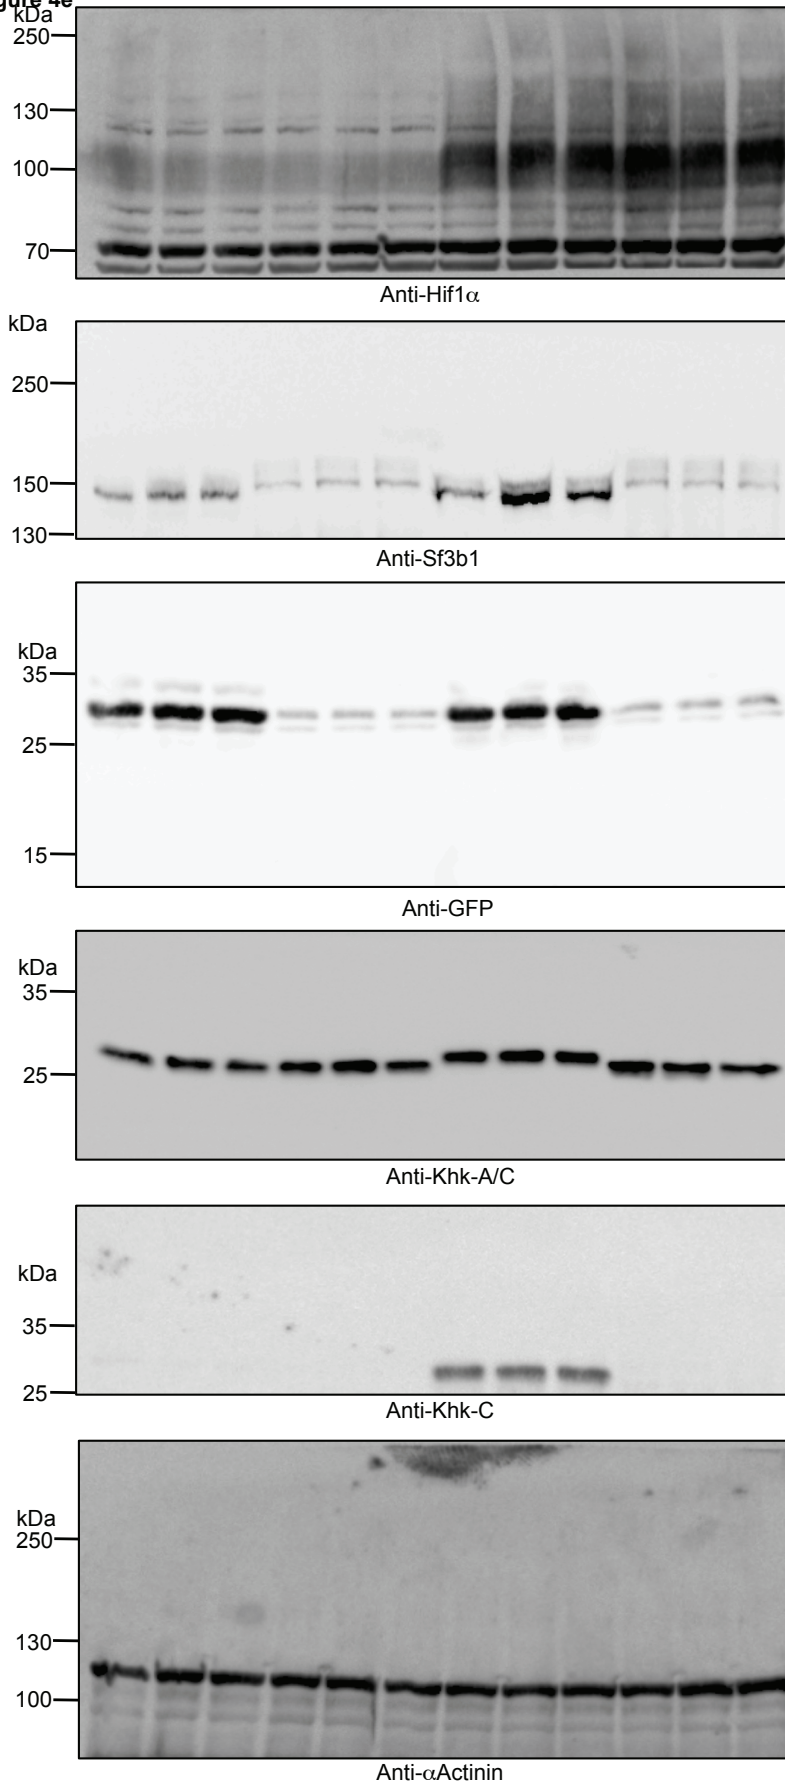



Immunoblots Figure 4h

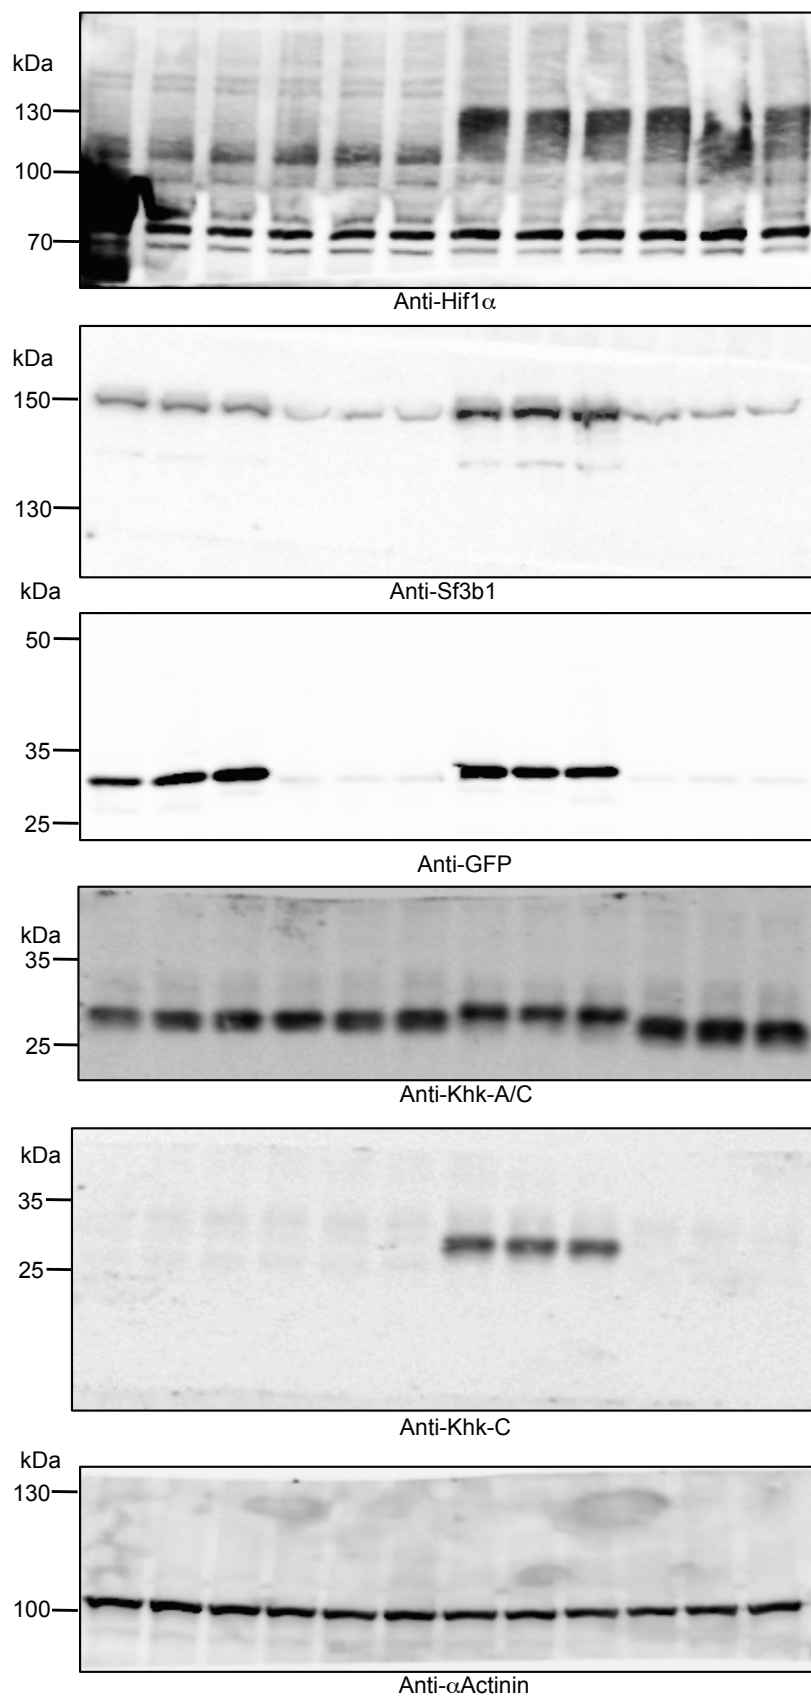

Immunoblots Figure 5d

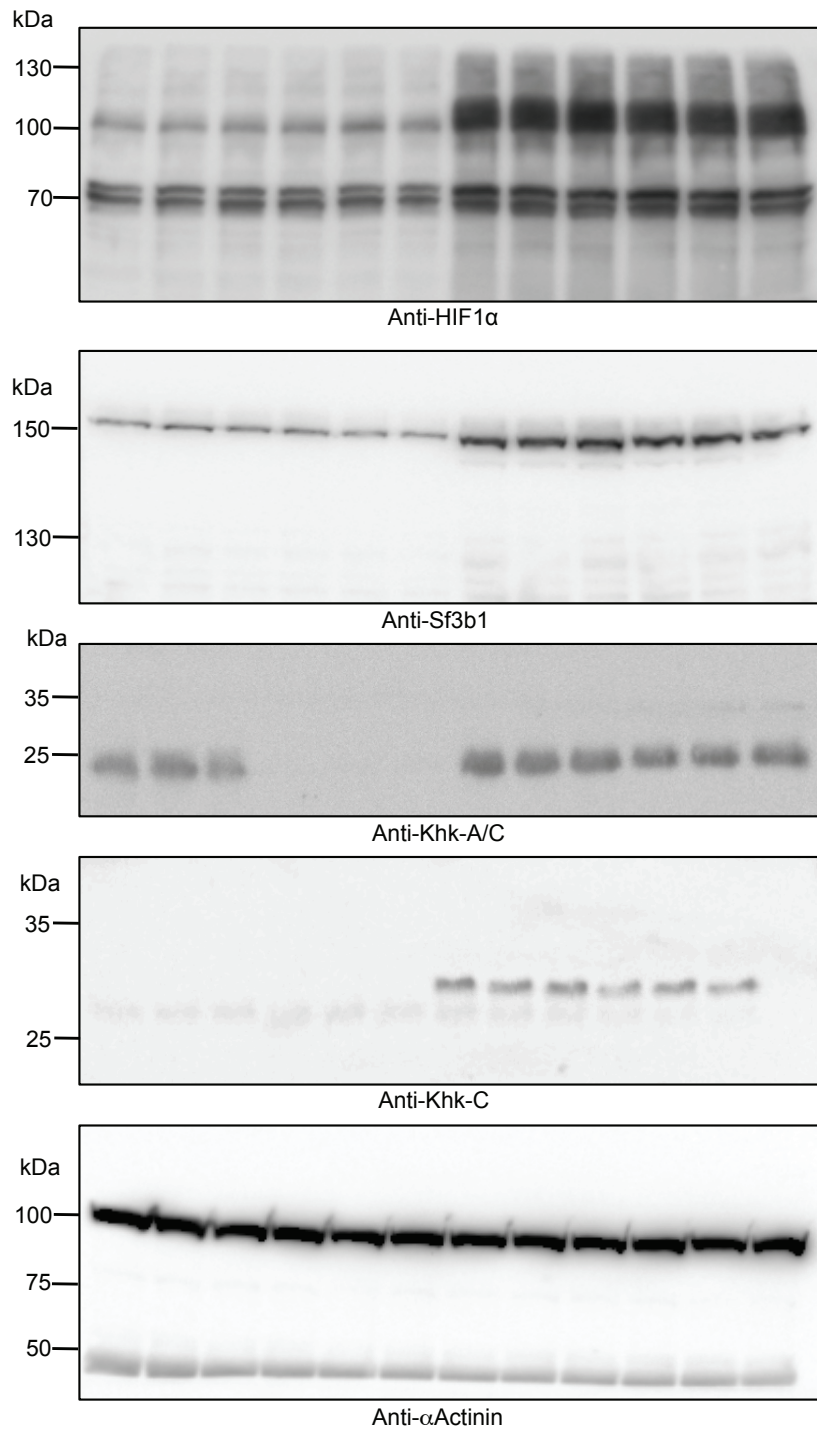

Immunoblots Figure 5h

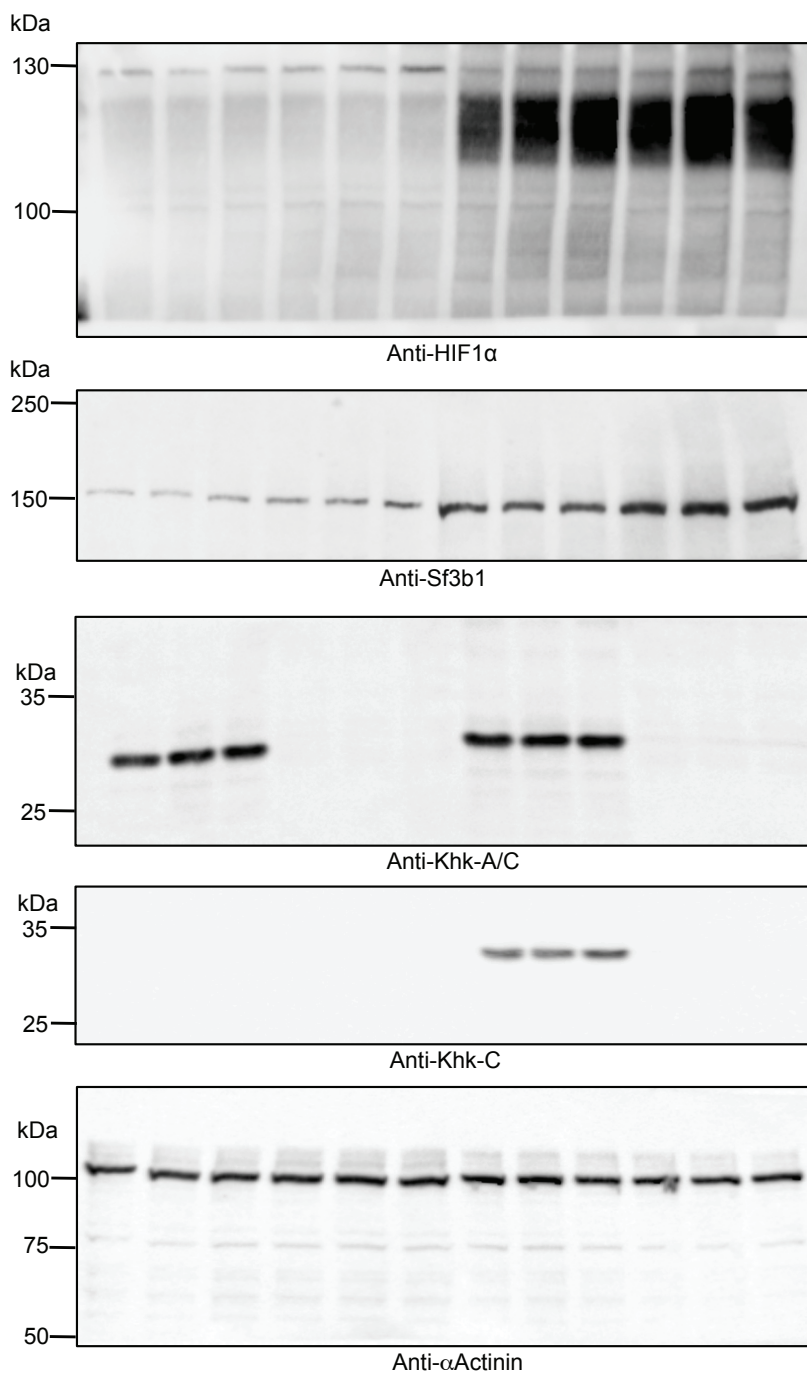

Supplement: NIHMS67309-supplement-Supplementary_Information.pdf [file NIHMS67309-supplement-Supplementary_Information.pdf]
